# Supplementary material for: What Is Case Management? A Scoping and Mapping Review
Source: PubMed Central journal article supplement (PMC5388031; doi:10.5334/ijic.2477), 2016-10-19
Supplement: ijic-16-4-2477-s1.pdf [file ijic-16-4-2477-s1.pdf]

**Appendix 1****Search strategy key words**

['support broker' or 'community care manag\*' or 'case manag\*' or 'care monitor\*' or 'case monitor\*' or 'support coordinat\*' or 'case coordinat\*' or 'care coordinat\*' or 'case management'] AND [definit\* or model or Theor\* or descript\* or describe\* or approach\* or program evaluation or program develop\* or taxonom\*] AND [brain injury or head injury or brain trauma or head trauma or brain damage or ABI,mp or TBI.mp] OR [mental health or opioid related disorders or anxiety disorders or depressive disorder or schizophrenia or psychotic disorders or stress, psychological] OR [diabetes mellitus, Type 2 or Type 1, or diabet\*] OR spinal cord injuries or spinal cord injury or SCI.mp or quadriplegia or tetraplegia].
